# Supplementary material
Source: MDPI journal article supplement (https://www.mdpi.com/2073-4433/14/3/505)
Supplement: s1 [file s1]

Supplementary for

# Future Changes in Thermal Bioclimate Conditions over West Bengal, India, Based on a Climate Model

Sourabh Bal <sup>1,2,\*</sup> and Ingo Kirchner <sup>2</sup>

<sup>1</sup> Department of Physics, Swami Vivekananda Institute of Science & Technology, Kolkata 700145, India

<sup>2</sup> Institute for Meteorology, Freie Universität, 12165 Berlin, Germany

\* Correspondence: sourabhbhal@gmail.com or sourabhbhal@zedat.fu-berlin.de

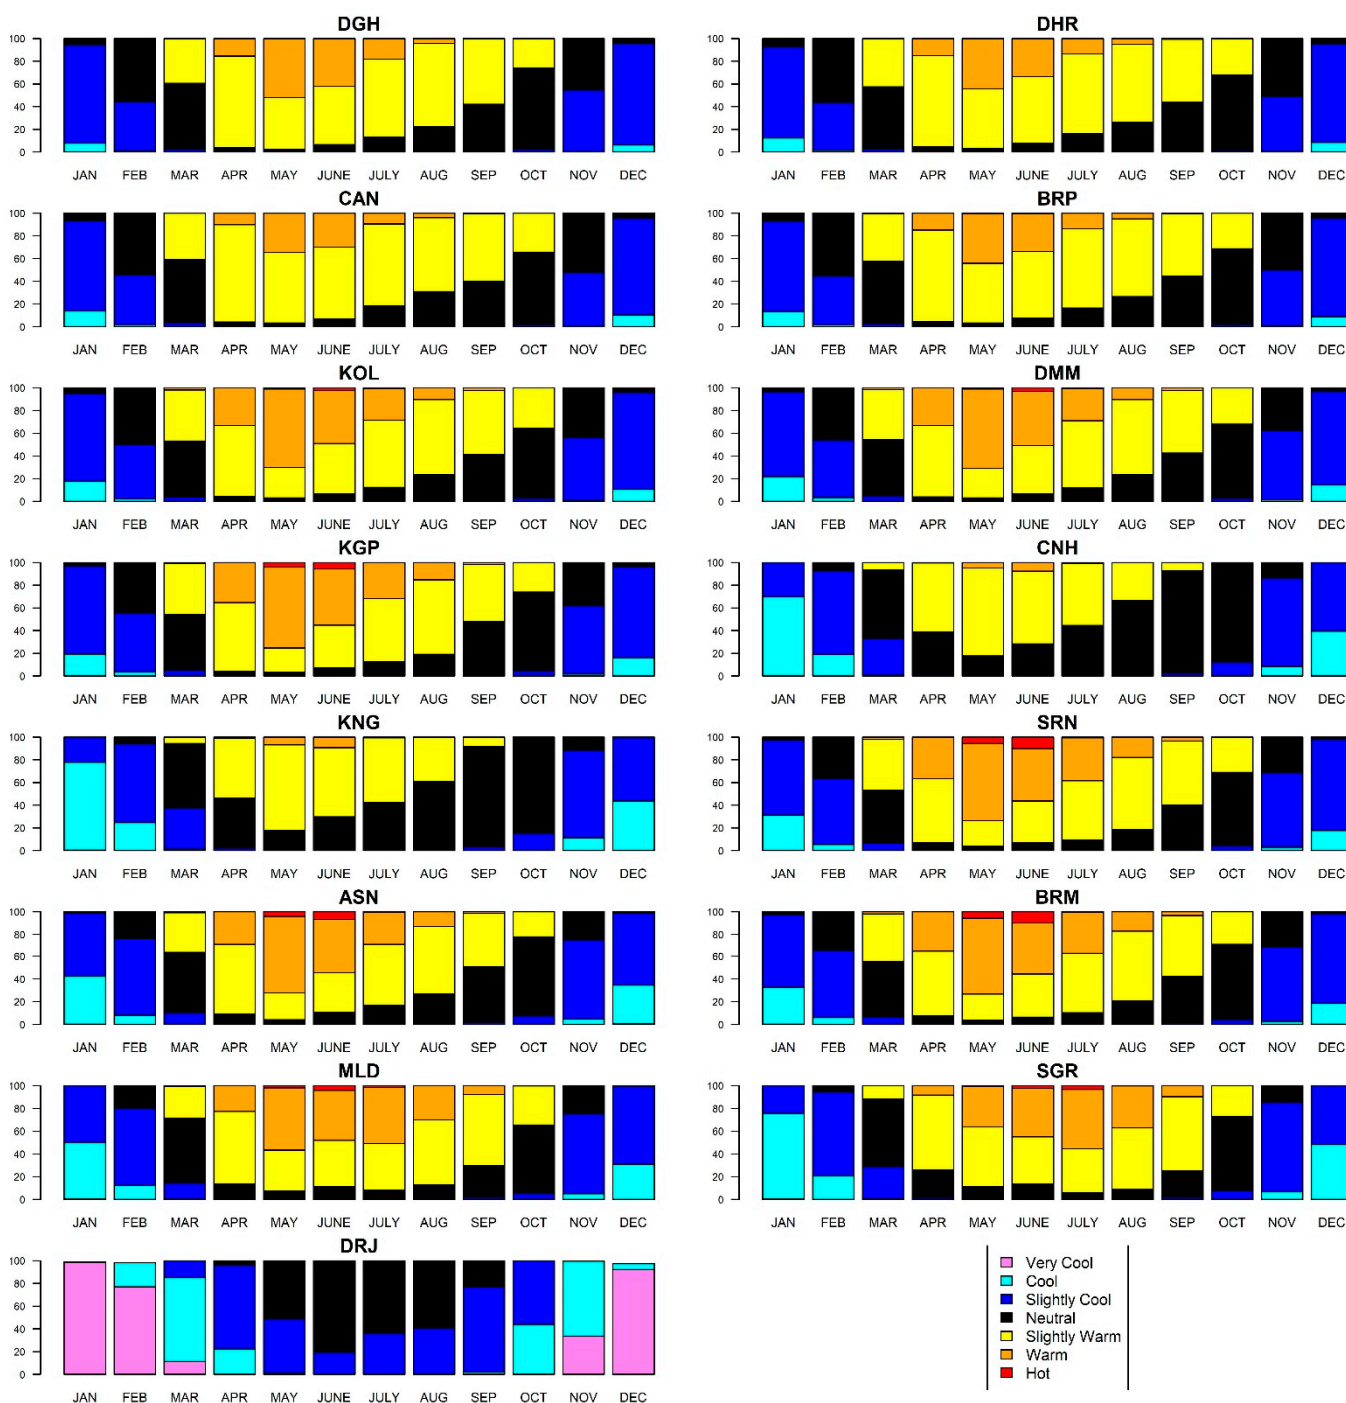

**Figure S1.** Intra-annual frequency diagram of different PET classes over the investigated stations extracted from the CORDEX (2016-2035) under RCP4.5 condition. The abbreviations of each station are explained in Table 1.

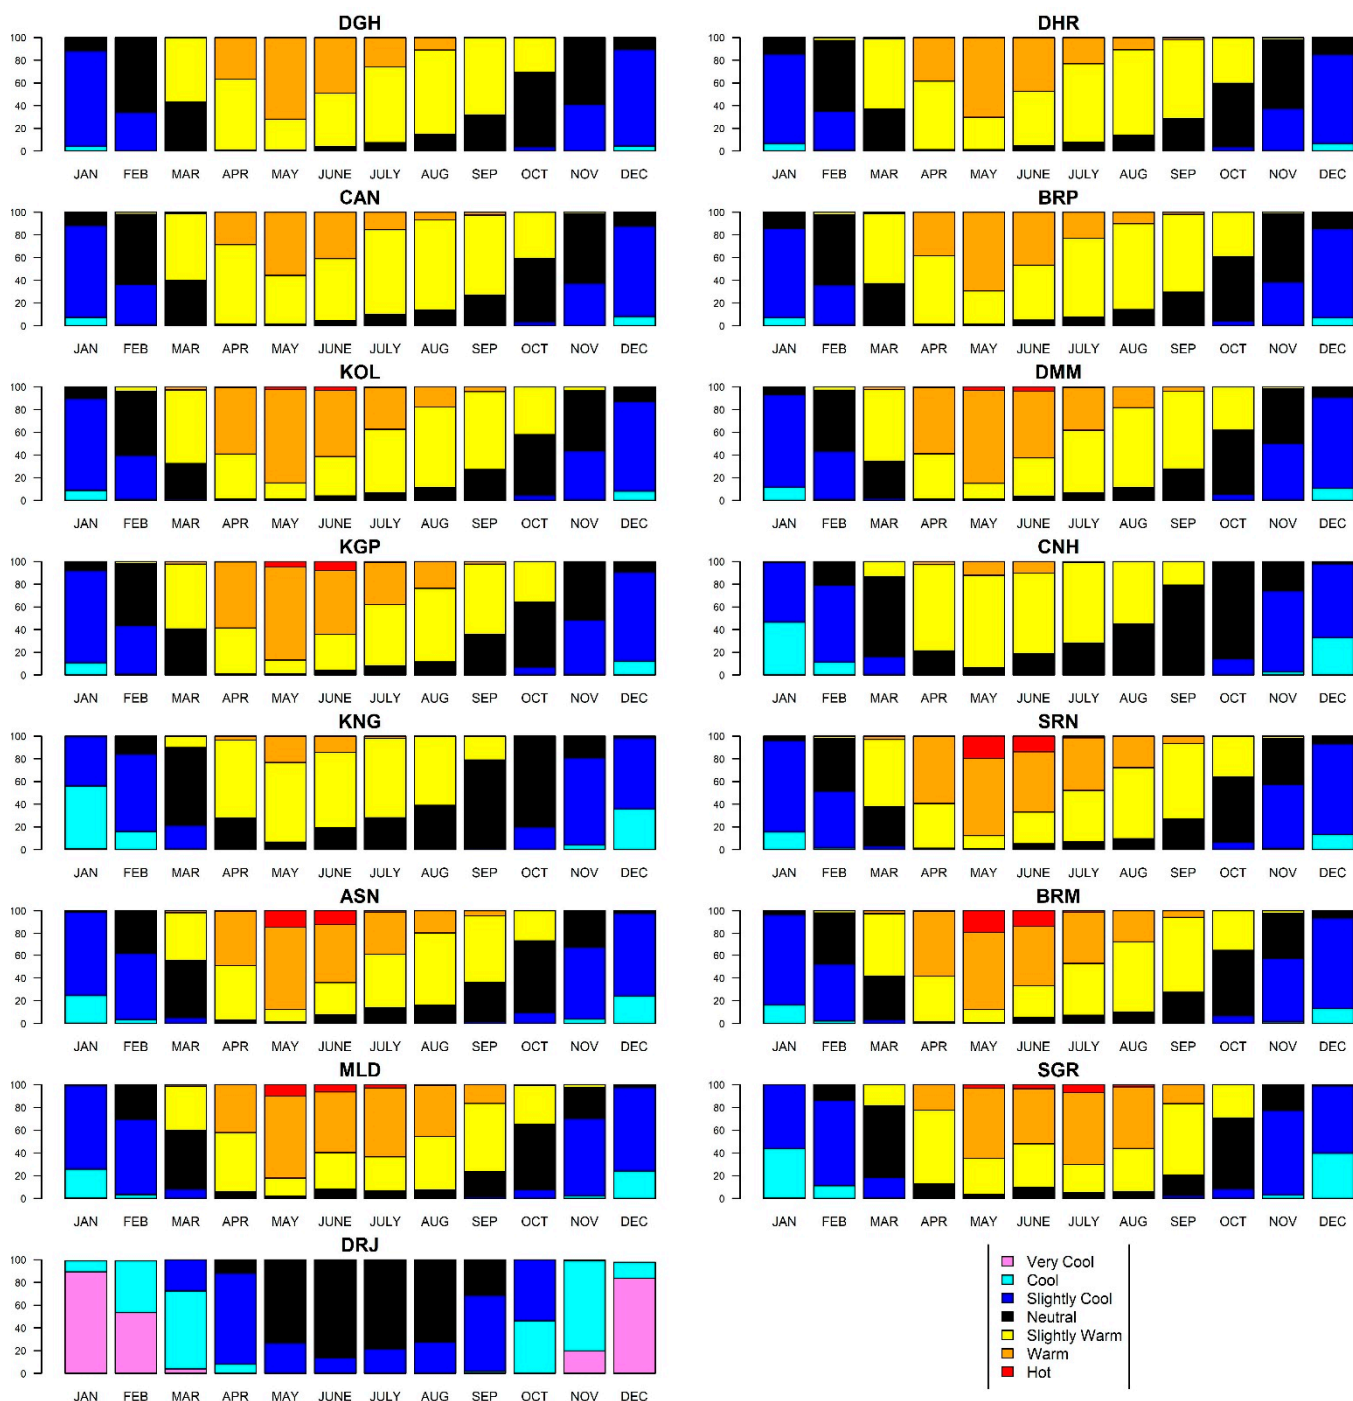

**Figure S2.** Intra-annual frequency diagram of different PET classes over the investigated stations extracted from the CORDEX (2046-2065) under RCP4.5 condition. The abbreviations of each station are explained in Table 1.

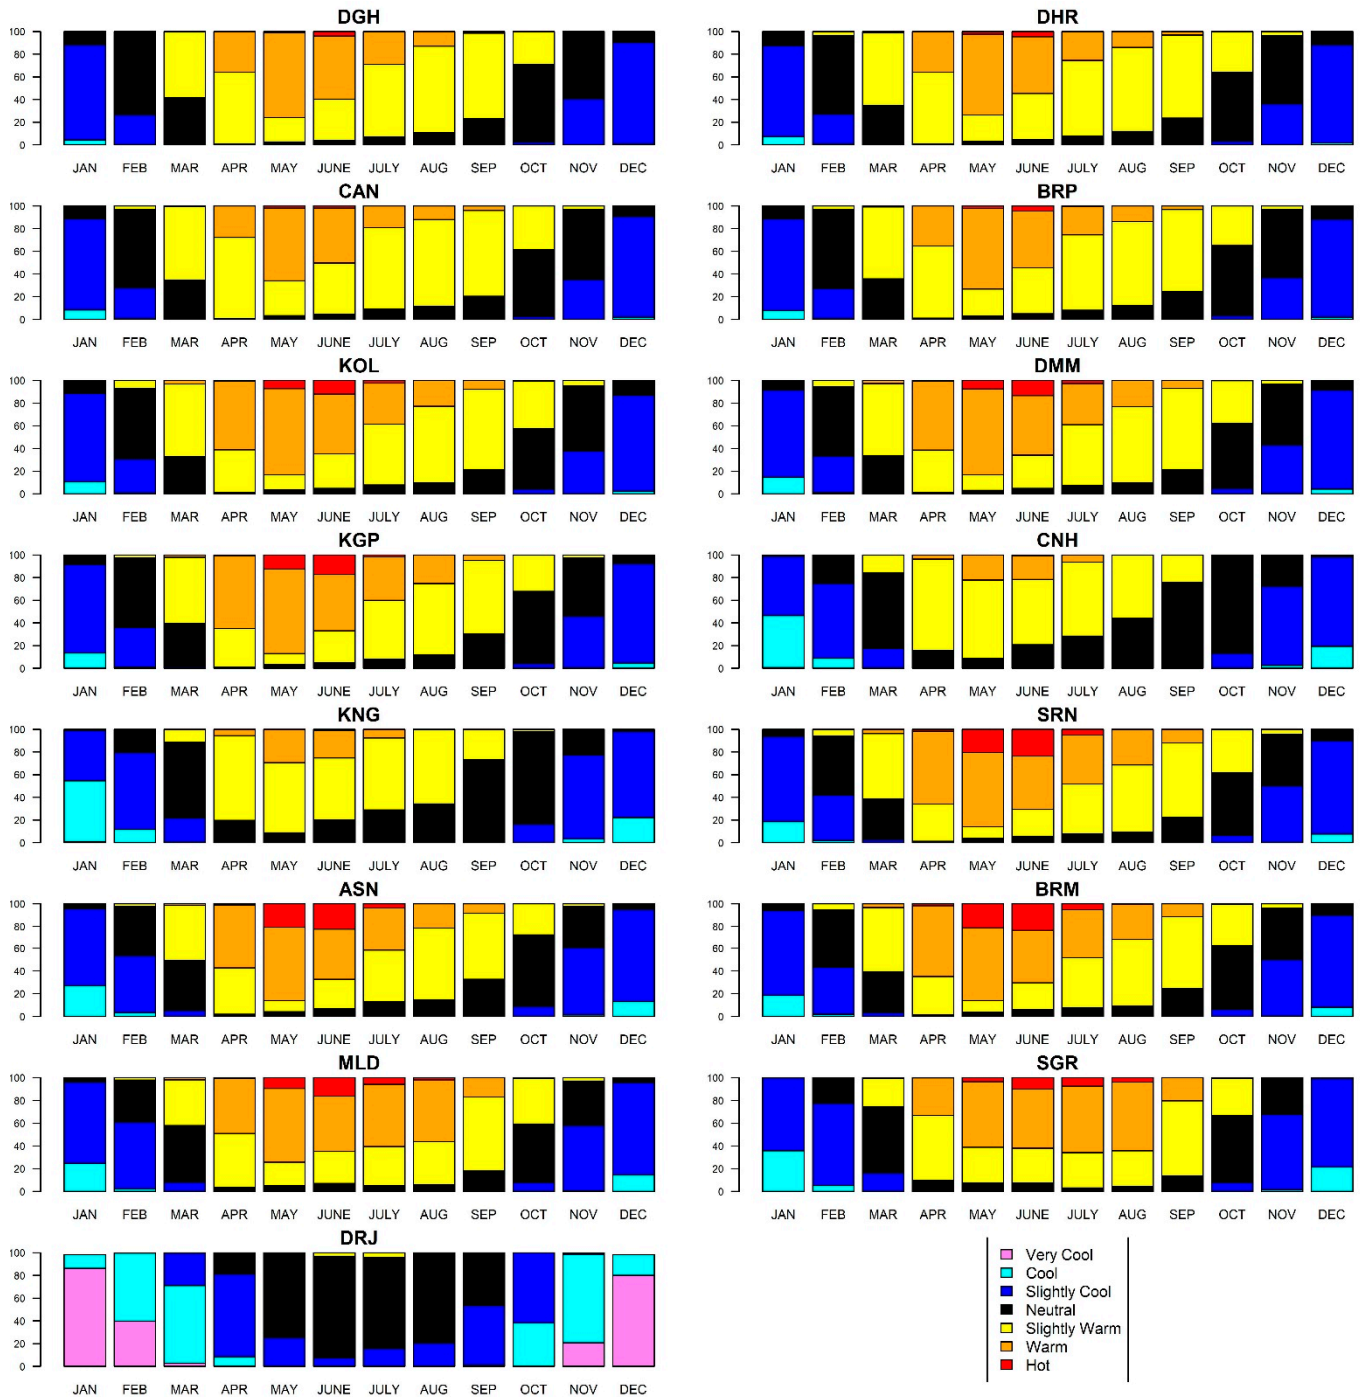

**Figure S3.** Intra-annual frequency diagram of different PET classes over the investigated stations extracted from the CORDEX (2080-2099) under RCP4.5 condition. The abbreviations of each station are explained in Table 1.

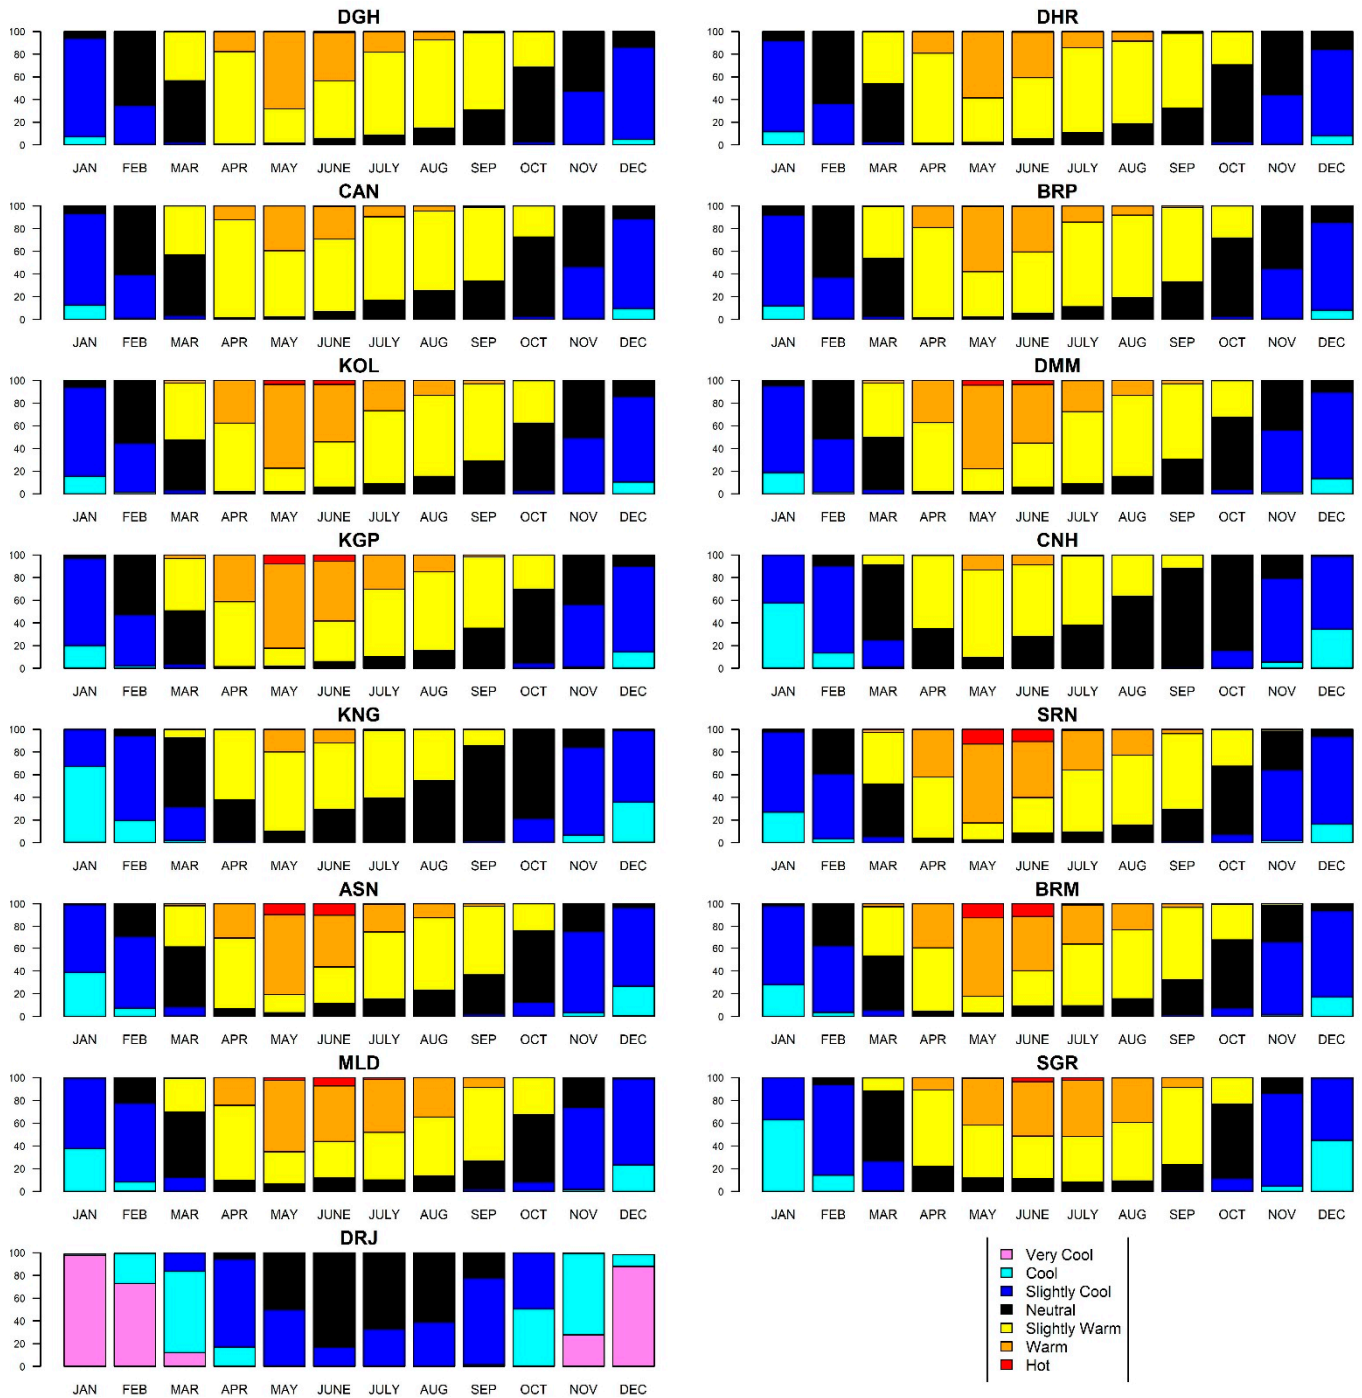

**Figure S4.** Intra-annual frequency diagram of different PET classes over the investigated stations extracted from the CORDEX (2016-2035) under RCP8.5 condition. The abbreviations of each station are explained in Table 1.

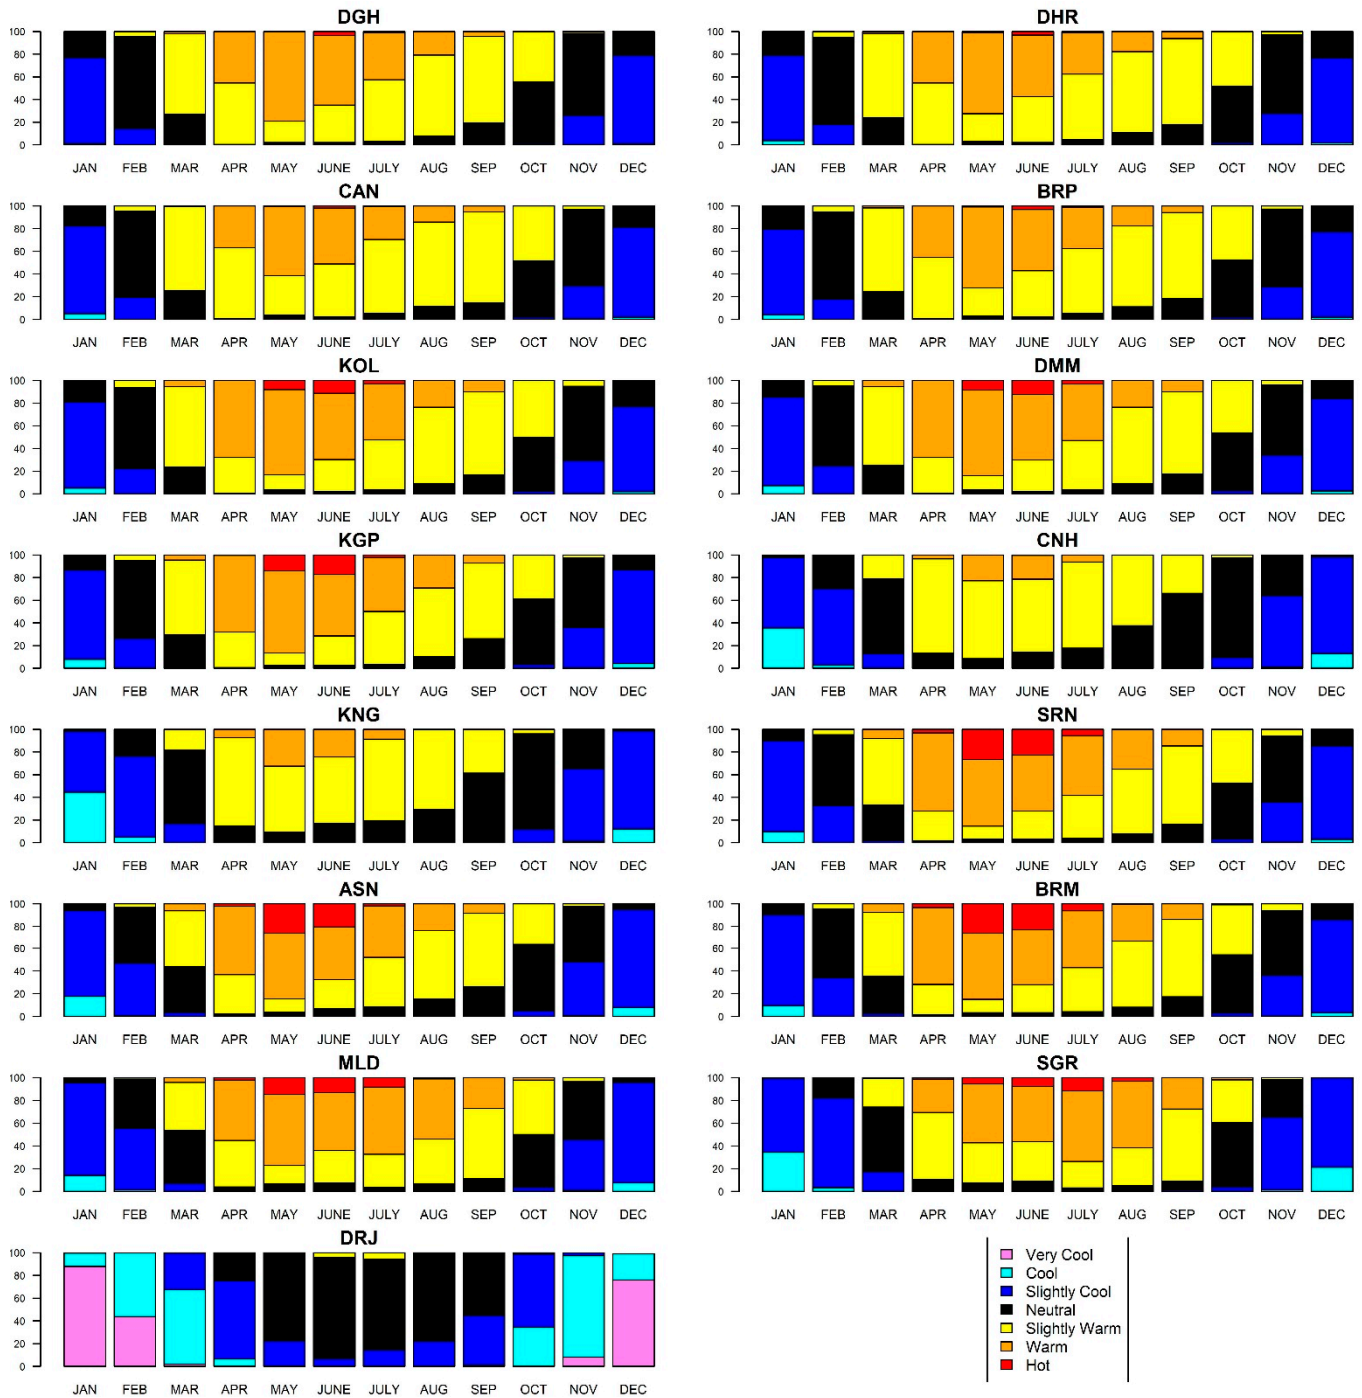

**Figure S5.** Intra-annual frequency diagram of different PET classes over the investigated stations extracted from the CORDEX (2046-2065) under RCP8.5 condition. The abbreviations of each station are explained in Table 1.



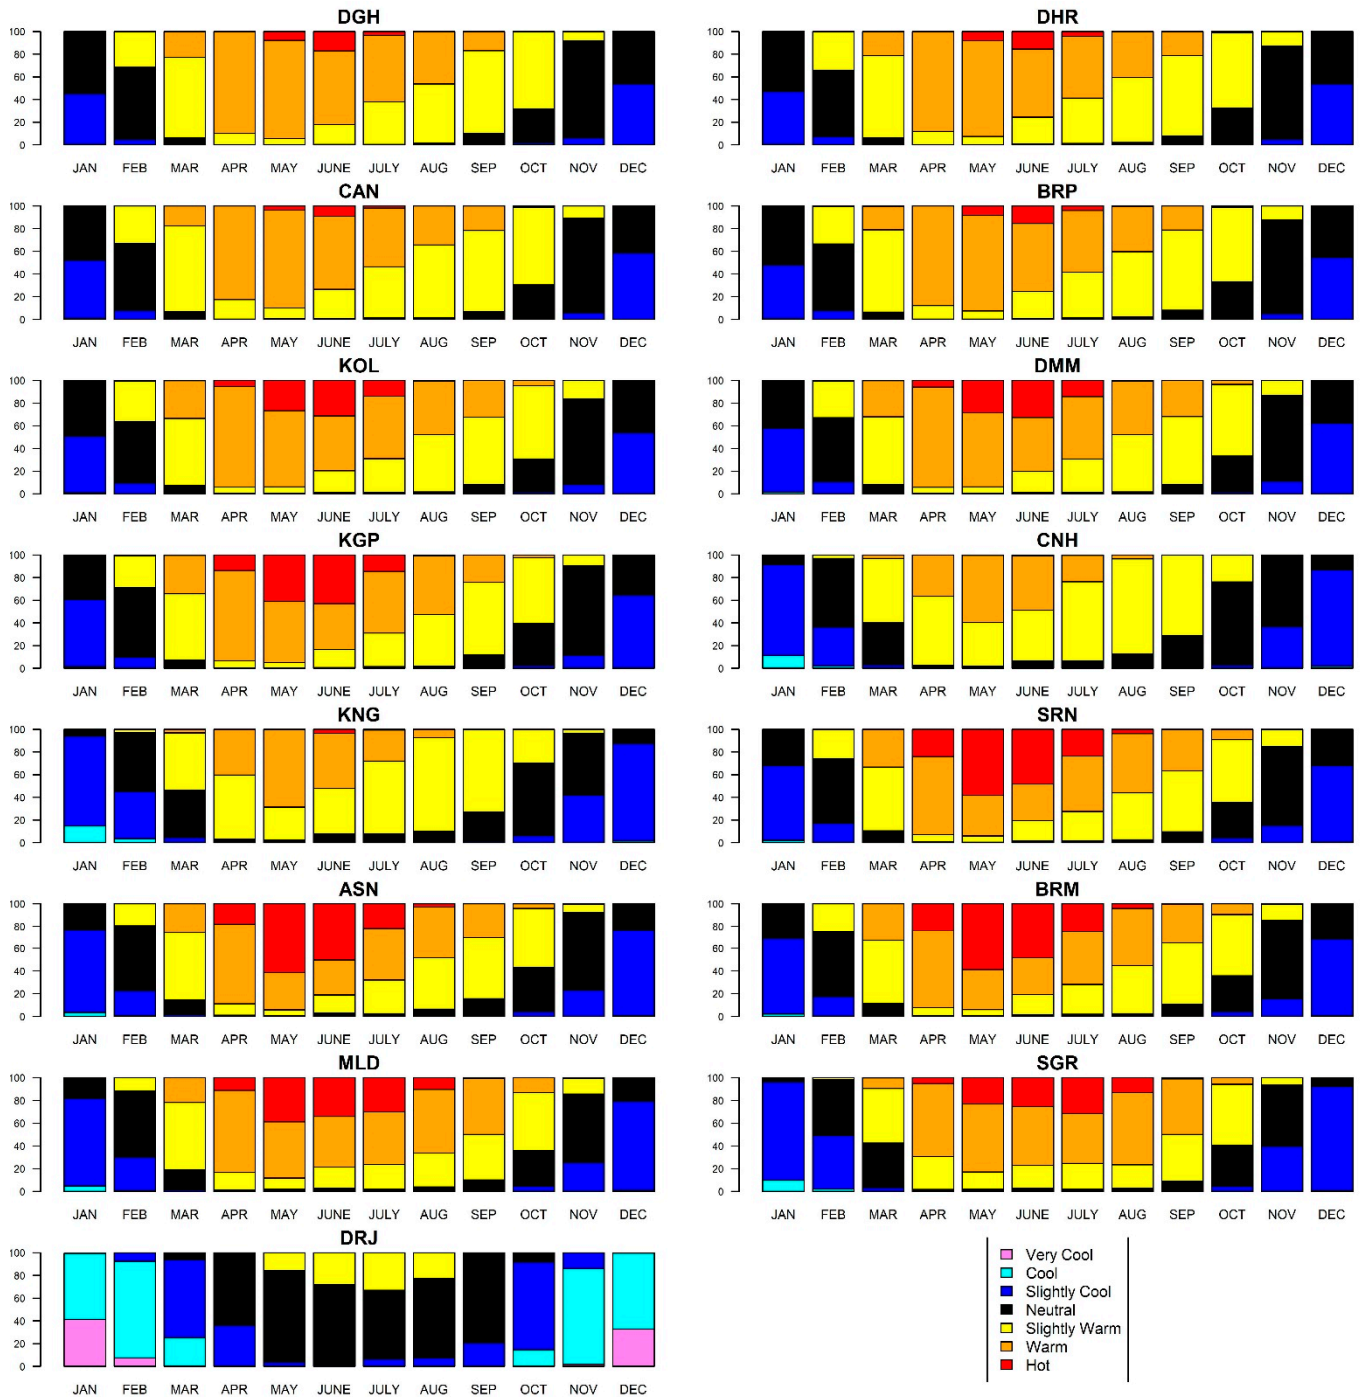

**Figure S6.** Intra-annual frequency diagram of different PET classes over the investigated stations extracted from the CORDEX (2080-2099) under RCP8.5 condition. The abbreviations of each station are explained in Table 1.

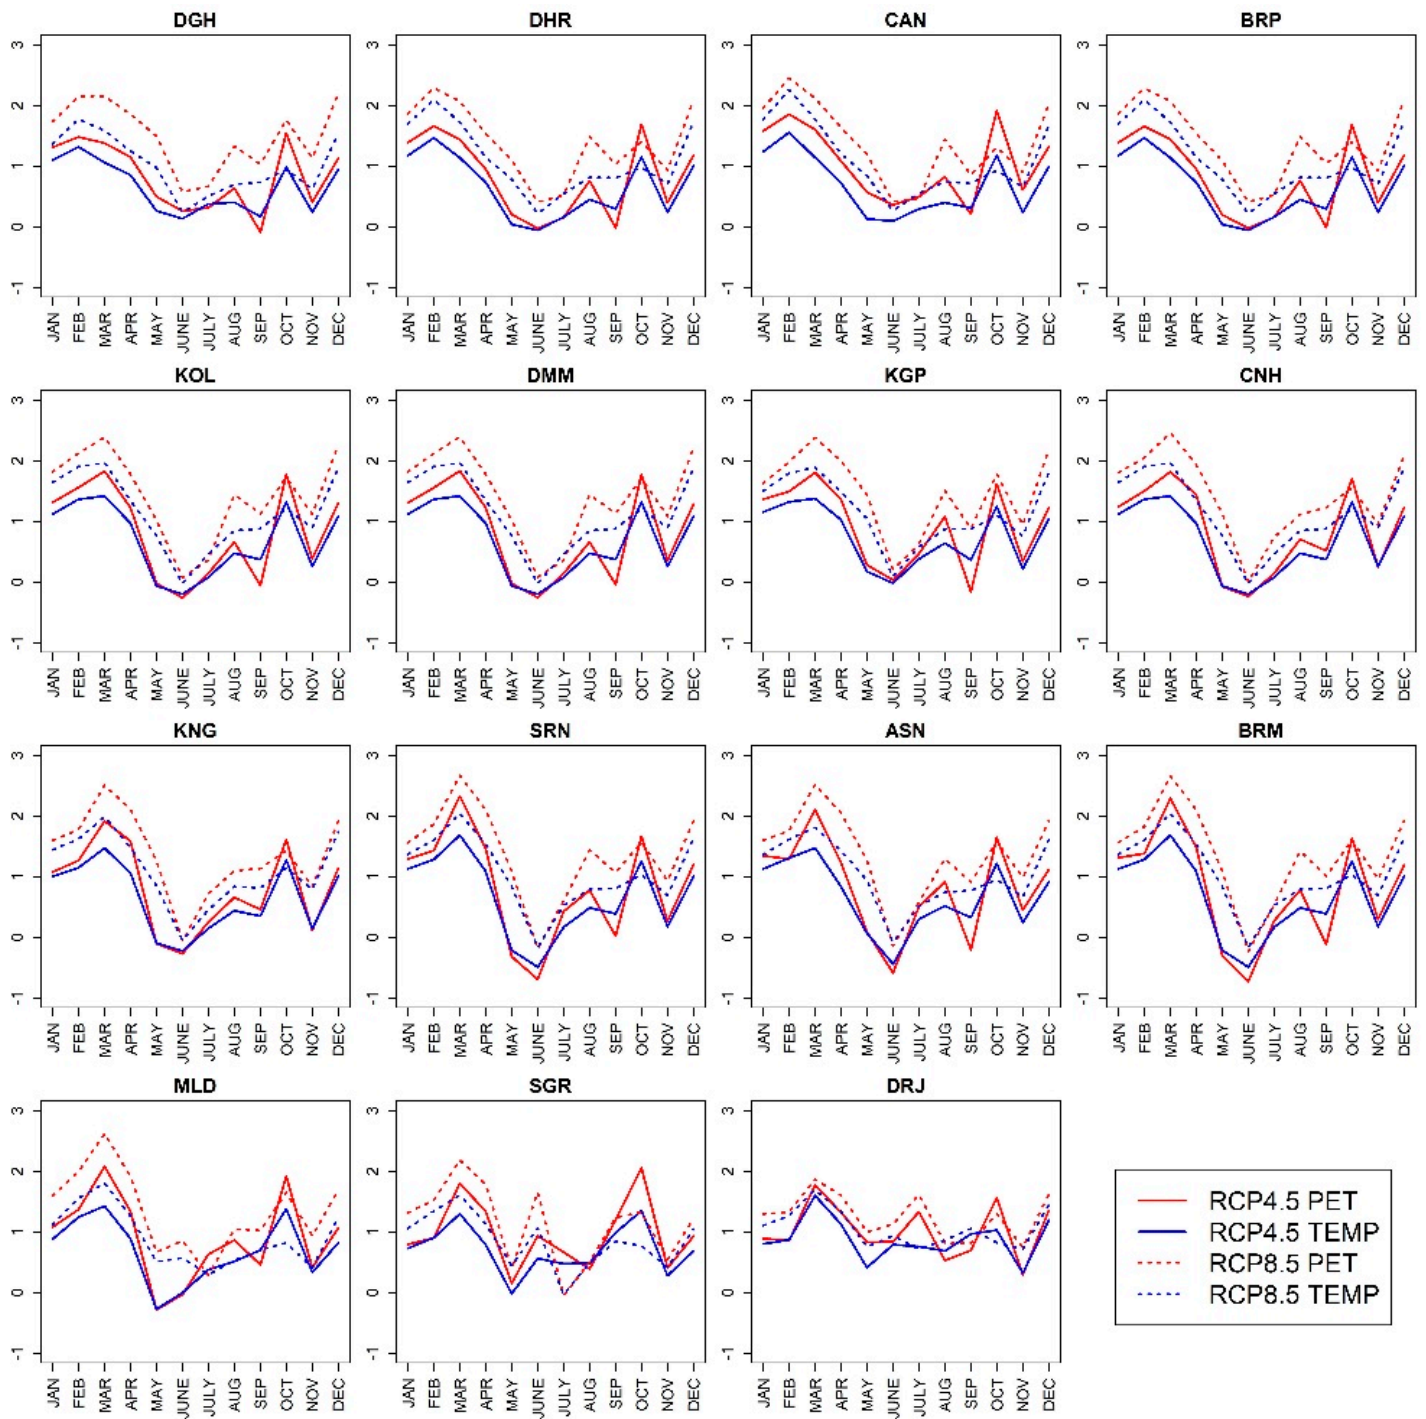

**Figure S7.** Mean monthly differences of PET and temperature for 15 considered stations in WB under RCP4.5 and RCP8.5 from CORDEX during 2016-2035 with respect to reference period (1986-2005). The abbreviations of all the investigated stations are described in Table 1.

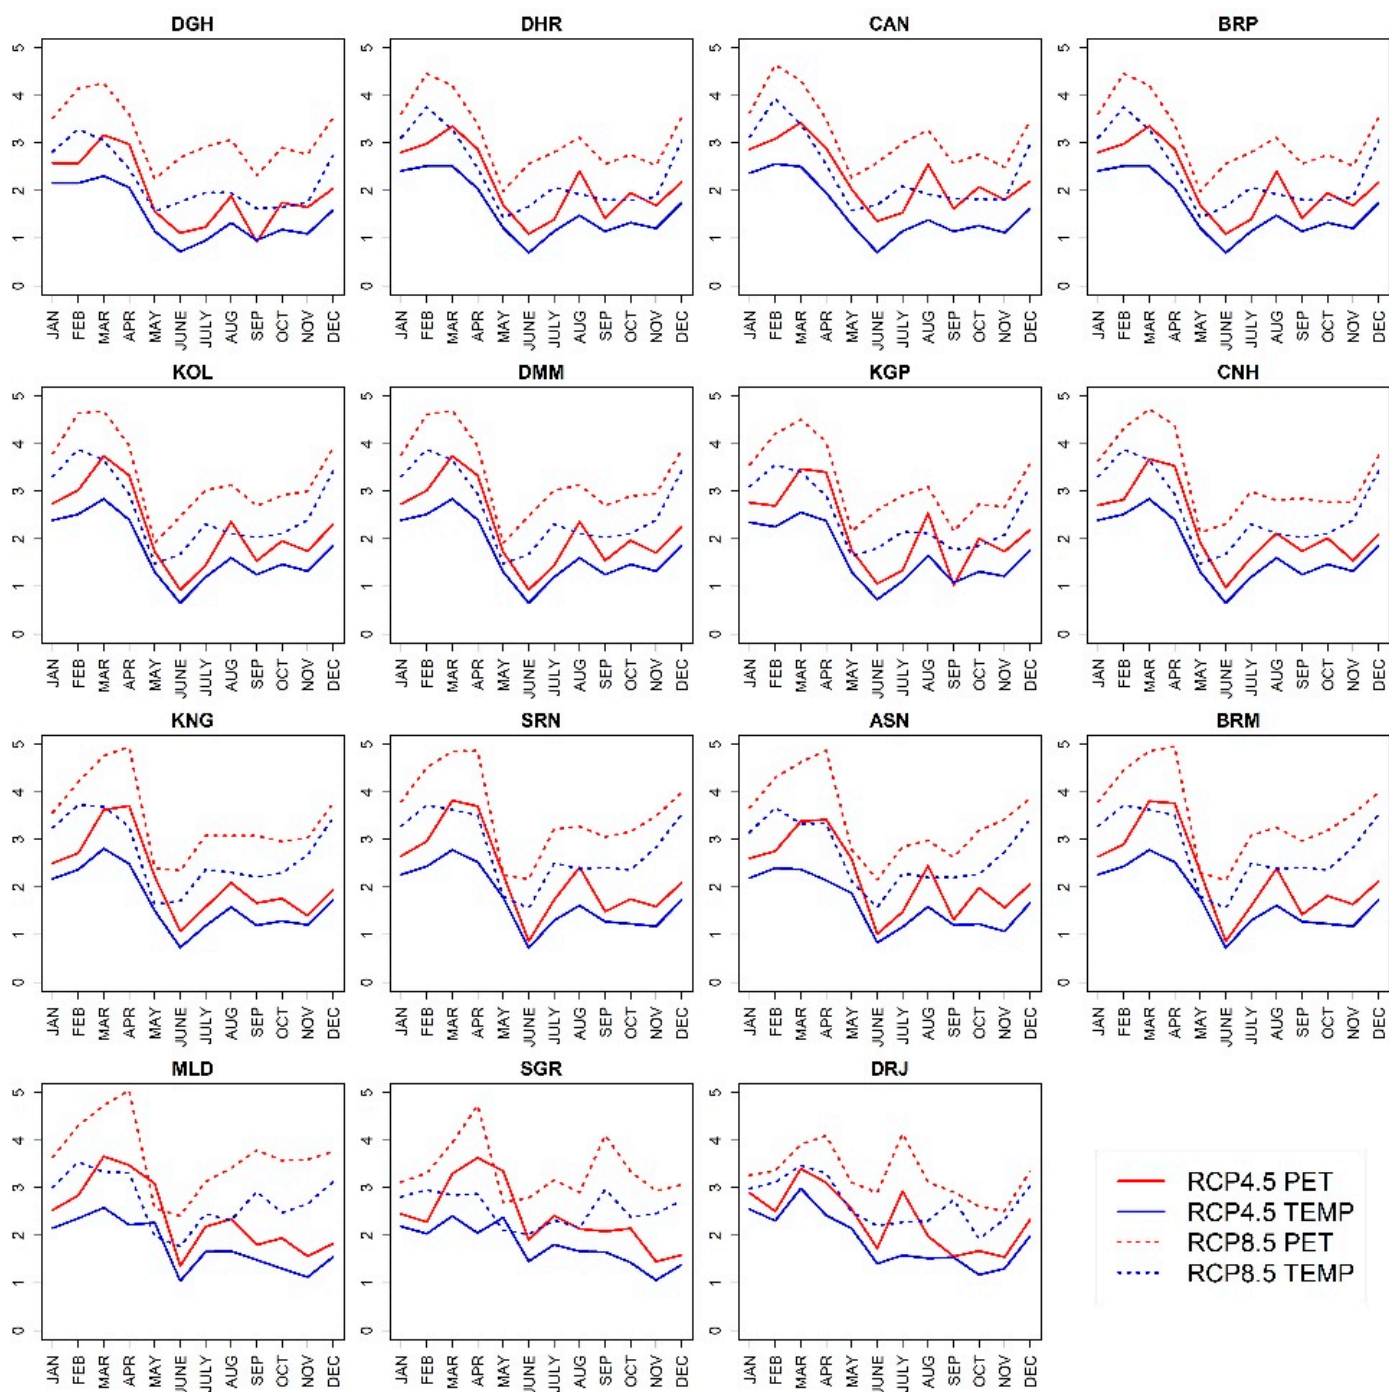

**Figure S8.** Mean monthly differences of PET and temperature for 15 considered stations in WB under RCP4.5 and RCP8.5 from CORDEX during 2046-2065 with respect to reference period (1986-2005). The abbreviations of all the investigated stations are described in Table 1.



**Table S1.** Descriptive statistics for the variables temperature, relative humidity, wind speed, cloud cover, PET for all the study sites during the period from 1986 to 2005 and for the period 2016-2035 under RCP4.5 and RCP8.5 conditions. PET values are calculated using RayMan model and meteorological variables are retrieved from the CORDEX archive.

| Variables                      | Station           | 1986-2005 (HISTORICAL) |         |      |        |                         | 2016-2035 (RCP4.5) |              |      |             |                       | 2016-2035 (RCP8.5) |              |      |             |                       |
|--------------------------------|-------------------|------------------------|---------|------|--------|-------------------------|--------------------|--------------|------|-------------|-----------------------|--------------------|--------------|------|-------------|-----------------------|
|                                |                   | Mini-<br>mum           | Maximum | Mean | Median | Standard De-<br>viation | Mini-<br>mum       | Maxi-<br>mum | Mean | Me-<br>dian | Standard<br>Deviation | Mini-<br>mum       | Maxi-<br>mum | Mean | Me-<br>dian | Standard<br>Deviation |
| Temperature (°C)               | Digha             | 11.1                   | 39.5    | 25.6 | 26.7   | 5.5                     | 11.1               | 40.2         | 26.3 | 27.2        | 5.3                   | 11.8               | 40.3         | 26.6 | 27.5        | 5.2                   |
|                                | Diamond Harbour   | 9                      | 40      | 25.5 | 26.8   | 5.8                     | 9.8                | 38.8         | 26.1 | 27.4        | 5.4                   | 9.9                | 39.6         | 26.6 | 27.8        | 5.4                   |
|                                | Canning           | 9.0                    | 38.5    | 25.2 | 26.8   | 5.6                     | 9.6                | 37.0         | 25.8 | 27.3        | 5.3                   | 9.9                | 38.9         | 26.3 | 27.6        | 5.3                   |
|                                | Baruipur          | 9.0                    | 40.0    | 25.5 | 26.8   | 5.8                     | 9.8                | 38.8         | 26.1 | 27.4        | 5.4                   | 9.9                | 39.6         | 26.6 | 27.8        | 5.4                   |
|                                | Alipore (Kolkata) | 7.3                    | 42.1    | 25.6 | 26.8   | 6.4                     | 9.0                | 41.4         | 26.3 | 27.5        | 6.0                   | 9.2                | 41.4         | 26.7 | 27.9        | 6                     |
|                                | Dum Dum           | 7.3                    | 42.1    | 25.6 | 26.8   | 6.4                     | 9.0                | 41.4         | 26.3 | 27.5        | 6.0                   | 9.2                | 41.4         | 26.7 | 27.9        | 6                     |
|                                | Kharagpur         | 8.1                    | 42.4    | 25.4 | 26.6   | 6.5                     | 8.3                | 42.5         | 26.2 | 27.2        | 6.3                   | 9.1                | 42.8         | 26.6 | 27.6        | 6.3                   |
|                                | Cinsurah          | 7.3                    | 42.1    | 25.6 | 26.8   | 6.4                     | 9.0                | 41.4         | 26.3 | 27.5        | 6.0                   | 9.2                | 41.4         | 26.7 | 27.9        | 6                     |
|                                | Krishnanagar      | 6.6                    | 41.8    | 25.5 | 26.6   | 6.5                     | 8.7                | 41.4         | 26.1 | 27.4        | 6.2                   | 9.2                | 42.7         | 26.7 | 27.7        | 6.3                   |
|                                | Srinekatan        | 6.1                    | 42.5    | 25.4 | 26.5   | 6.8                     | 7.9                | 41.6         | 26.1 | 27.2        | 6.5                   | 9.1                | 43.3         | 26.5 | 27.5        | 6.6                   |
|                                | Asansol           | 6.6                    | 42.8    | 24.8 | 25.8   | 6.8                     | 7.5                | 41.1         | 25.4 | 26.5        | 6.5                   | 8                  | 42.5         | 25.8 | 26.8        | 6.6                   |
|                                | Birbhum           | 6.1                    | 42.5    | 25.4 | 26.5   | 6.8                     | 7.9                | 41.6         | 26.1 | 27.2        | 6.5                   | 9.1                | 43.3         | 26.5 | 27.5        | 6.6                   |
|                                | Malda             | 7.2                    | 39.0    | 24.8 | 26.0   | 6.9                     | 8.7                | 39.7         | 25.5 | 26.8        | 6.7                   | 8.3                | 41.2         | 25.7 | 26.8        | 6.8                   |
|                                | Siliguri          | 6.1                    | 39.4    | 24.1 | 25.4   | 6.9                     | 8.2                | 40.3         | 24.8 | 26.1        | 6.9                   | 7.6                | 40.3         | 24.9 | 26.2        | 6.8                   |
|                                | Darjeeling        | -3.9                   | 22.1    | 11.0 | 12.7   | 6.1                     | -4.6               | 23.1         | 11.9 | 13.6        | 6.1                   | -4                 | 22.7         | 12   | 13.9        | 6                     |
| Relative Humidity (%)          | Digha             | 43.6                   | 97.4    | 77.0 | 76.8   | 8.0                     | 35.7               | 98.1         | 77.5 | 77.0        | 7.9                   | 45.3               | 97.5         | 77.4 | 77.3        | 8                     |
|                                | Diamond Harbour   | 26.7                   | 97.8    | 74.7 | 75.1   | 12.4                    | 22.9               | 98.4         | 75.0 | 75.4        | 12.3                  | 32.7               | 98.7         | 75   | 76.1        | 12.5                  |
|                                | Canning           | 32.1                   | 98.0    | 76.3 | 76.6   | 11.2                    | 34.5               | 98.7         | 76.5 | 76.6        | 11.1                  | 36.4               | 98.9         | 76.6 | 77.4        | 11.2                  |
|                                | Baruipur          | 26.7                   | 97.8    | 74.7 | 75.1   | 12.4                    | 22.9               | 98.4         | 75.0 | 75.4        | 12.3                  | 32.7               | 98.7         | 75   | 76.1        | 12.5                  |
|                                | Alipore (Kolkata) | 14.1                   | 97.9    | 73.4 | 76.0   | 14.7                    | 12.4               | 98.3         | 73.7 | 76.2        | 14.4                  | 21                 | 98           | 73.4 | 76.4        | 14.7                  |
|                                | Dum Dum           | 14.1                   | 97.9    | 73.4 | 76.0   | 14.7                    | 12.4               | 98.3         | 73.7 | 76.2        | 14.4                  | 21                 | 98           | 73.5 | 76.4        | 14.7                  |
|                                | Kharagpur         | 12.7                   | 97.7    | 69.7 | 71.8   | 16.8                    | 12.0               | 98.3         | 70.5 | 72.4        | 16.7                  | 14.7               | 97.9         | 70   | 72.8        | 16.9                  |
|                                | Cinsurah          | 14.1                   | 97.9    | 73.4 | 76.0   | 14.7                    | 12.4               | 98.3         | 73.7 | 76.2        | 14.4                  | 21                 | 98           | 73.5 | 76.4        | 14.7                  |
|                                | Krishnanagar      | 5.5                    | 98.6    | 69.7 | 75.0   | 18.8                    | 8.8                | 98.3         | 70.0 | 74.8        | 18.3                  | 9.5                | 98           | 69.7 | 74.9        | 18.5                  |
|                                | Srinekatan        | 4.2                    | 98.1    | 67.7 | 73.6   | 20.9                    | 7.9                | 97.7         | 68.1 | 74.3        | 20.6                  | 7.1                | 97.8         | 67.7 | 73.8        | 20.6                  |
|                                | Asansol           | 3.1                    | 98.0    | 59.3 | 65.1   | 25.3                    | 2.3                | 98.2         | 59.9 | 66.0        | 25.5                  | 4                  | 98.4         | 59.4 | 65.5        | 25                    |
|                                | Birbhum           | 4.5                    | 98.0    | 64.9 | 70.9   | 22.8                    | 6.3                | 98.2         | 65.4 | 72.1        | 22.7                  | 5.2                | 98           | 64.9 | 71.2        | 22.5                  |
|                                | Malda             | 5.8                    | 97.9    | 65.9 | 75.1   | 23.7                    | 5.2                | 98.2         | 65.2 | 73.4        | 23.3                  | 4.3                | 98.1         | 65.1 | 73.5        | 23.3                  |
|                                | Siliguri          | 2.2                    | 97.4    | 51.1 | 56.1   | 27.6                    | 2.2                | 98.1         | 51.2 | 55.9        | 27.1                  | 2.3                | 98.2         | 49.5 | 53.4        | 26.2                  |
|                                | Darjeeling        | 2.8                    | 99.1    | 53.4 | 56.4   | 30.3                    | 3.0                | 99.8         | 54.2 | 58.7        | 29.8                  | 3.1                | 99.4         | 52.9 | 54.7        | 29.5                  |
| Wind Speed (ms <sup>-1</sup> ) | Digha             | 0.9                    | 16.3    | 4.0  | 3.6    | 1.9                     | 0.7                | 23.0         | 4.0  | 3.6         | 2.1                   | 0.9                | 22.9         | 4.1  | 3.6         | 2                     |

|                    |                   |      |      |      |      |     |     |      |      |      |     |     |      |      |      |     |
|--------------------|-------------------|------|------|------|------|-----|-----|------|------|------|-----|-----|------|------|------|-----|
|                    | Diamond Harbour   | 0.6  | 15.9 | 3.6  | 3.1  | 1.8 | 0.6 | 18.8 | 3.6  | 3.1  | 2.9 | 0.6 | 15.6 | 3.7  | 3.2  | 1.9 |
|                    | Canning           | 0.6  | 19.8 | 3.5  | 3.1  | 1.8 | 0.6 | 18.7 | 3.6  | 3.1  | 1.9 | 0.6 | 16.3 | 3.6  | 3.1  | 1.9 |
|                    | Baruipur          | 0.6  | 15.9 | 3.6  | 3.1  | 1.8 | 0.6 | 18.8 | 3.6  | 3.1  | 1.9 | 0.6 | 15.6 | 3.7  | 3.2  | 1.9 |
|                    | Alipore (Kolkata) | 0.6  | 13.5 | 3.2  | 2.8  | 1.5 | 0.5 | 16.4 | 3.2  | 2.8  | 1.6 | 0.4 | 13.8 | 3.2  | 2.9  | 1.6 |
|                    | Dum Dum           | 0.6  | 13.5 | 3.2  | 2.8  | 1.5 | 0.5 | 16.4 | 3.2  | 2.8  | 1.6 | 0.4 | 13.8 | 3.2  | 2.9  | 1.6 |
|                    | Kharagpur         | 0.6  | 14.3 | 3.3  | 3.0  | 1.5 | 0.7 | 17.4 | 3.3  | 3.0  | 1.6 | 0.7 | 16.6 | 3.3  | 3    | 1.6 |
|                    | Cinsurah          | 0.6  | 13.5 | 3.2  | 2.8  | 1.5 | 0.5 | 16.4 | 3.2  | 2.8  | 1.6 | 0.4 | 13.8 | 3.2  | 2.9  | 1.6 |
|                    | Krishnanagar      | 0.5  | 13.7 | 3.2  | 2.9  | 1.6 | 0.5 | 18.6 | 3.2  | 2.8  | 1.7 | 0.6 | 14.6 | 3.3  | 2.9  | 1.6 |
|                    | Srinekatan        | 0.5  | 12.5 | 3.1  | 2.8  | 1.4 | 0.4 | 17.0 | 3.1  | 2.8  | 1.5 | 0.6 | 13.6 | 3.1  | 2.8  | 1.5 |
|                    | Asansol           | 0.7  | 12.5 | 3.2  | 2.9  | 1.4 | 0.6 | 15.0 | 3.2  | 2.9  | 1.5 | 0.6 | 12.2 | 3.2  | 2.9  | 1.4 |
|                    | Birbhum           | 0.5  | 12.5 | 3.1  | 2.8  | 1.4 | 0.4 | 17.0 | 3.1  | 2.8  | 1.5 | 0.6 | 13.6 | 3.1  | 2.8  | 1.5 |
|                    | Malda             | 0.6  | 13.1 | 3.0  | 2.7  | 1.5 | 0.5 | 14.2 | 3.0  | 2.7  | 1.5 | 0.6 | 14.9 | 3    | 2.6  | 1.5 |
|                    | Siliguri          | 0.6  | 12.1 | 2.7  | 2.4  | 1.4 | 0.6 | 13.0 | 2.7  | 2.3  | 1.5 | 0.6 | 14.9 | 2.7  | 2.3  | 1.4 |
|                    | Darjeeling        | 0.3  | 2.2  | 1.0  | 1.0  | 0.3 | 0.3 | 2.9  | 1.0  | 1.0  | 0.3 | 0.3 | 2.7  | 1    | 1    | 0.3 |
|                    |                   |      |      |      |      |     |     |      |      |      |     |     |      |      |      |     |
| Cloud Cover (Octa) | Digha             | 0.0  | 8.0  | 2.6  | 1.9  | 2.5 | 0.0 | 8.0  | 2.6  | 1.9  | 2.6 | 0   | 8    | 2.6  | 1.8  | 2.5 |
|                    | Diamond Harbour   | 0.0  | 8.0  | 2.7  | 2.1  | 2.5 | 0.0 | 8.0  | 2.7  | 1.9  | 2.6 | 0   | 8    | 2.6  | 1.9  | 2.5 |
|                    | Canning           | 0.0  | 8.0  | 2.7  | 2.2  | 2.5 | 0.0 | 8.0  | 2.7  | 2.0  | 2.6 | 0   | 8    | 2.6  | 1.9  | 2.5 |
|                    | Baruipur          | 0.0  | 8.0  | 2.7  | 2.1  | 2.5 | 0.0 | 8.0  | 2.7  | 1.9  | 2.6 | 0   | 8    | 2.6  | 1.9  | 2.5 |
|                    | Alipore (Kolkata) | 0.0  | 8.0  | 2.6  | 1.9  | 2.5 | 0.0 | 8.0  | 2.6  | 1.8  | 2.6 | 0   | 8    | 2.5  | 1.7  | 2.5 |
|                    | Dum Dum           | 0.0  | 8.0  | 2.6  | 1.9  | 2.5 | 0.0 | 8.0  | 2.6  | 1.8  | 2.5 | 0   | 8    | 2.5  | 1.7  | 2.5 |
|                    | Kharagpur         | 0.0  | 8.0  | 2.6  | 1.8  | 2.6 | 0.0 | 8.0  | 2.6  | 1.7  | 2.6 | 0   | 8    | 2.5  | 1.6  | 2.6 |
|                    | Cinsurah          | 0.0  | 8.0  | 2.6  | 1.9  | 2.5 | 0.0 | 8.0  | 2.6  | 1.8  | 2.6 | 0   | 8    | 2.5  | 1.7  | 2.5 |
|                    | Krishnanagar      | 0.0  | 8.0  | 2.5  | 1.8  | 2.5 | 0.0 | 8.0  | 2.5  | 1.6  | 2.5 | 0   | 8    | 2.4  | 1.6  | 2.5 |
|                    | Srinekatan        | 0.0  | 8.0  | 2.5  | 1.7  | 2.5 | 0.0 | 8.0  | 2.4  | 1.5  | 2.5 | 0   | 8    | 2.4  | 1.5  | 2.5 |
|                    | Asansol           | 0.0  | 8.0  | 2.5  | 1.7  | 2.6 | 0.0 | 8.0  | 2.5  | 1.5  | 2.6 | 0   | 8    | 2.4  | 1.5  | 2.5 |
|                    | Birbhum           | 0.0  | 8.0  | 2.5  | 1.7  | 2.5 | 0.0 | 8.0  | 2.4  | 1.5  | 2.5 | 0   | 8    | 2.4  | 1.5  | 2.5 |
|                    | Malda             | 0.0  | 8.0  | 2.4  | 1.5  | 2.5 | 0.0 | 8.0  | 2.3  | 1.4  | 2.5 | 0   | 8    | 2.3  | 1.3  | 2.5 |
|                    | Siliguri          | 0.0  | 8.0  | 2.4  | 1.4  | 2.5 | 0.0 | 8.0  | 2.3  | 1.3  | 2.5 | 0   | 8    | 2.3  | 1.3  | 2.5 |
|                    | Darjeeling        | 0.0  | 8.0  | 3.3  | 3.0  | 2.6 | 0.0 | 8.0  | 3.1  | 2.9  | 2.6 | 0   | 8    | 3.1  | 2.8  | 2.6 |
|                    |                   |      |      |      |      |     |     |      |      |      |     |     |      |      |      |     |
| PET (°C)           | Digha             | 6.3  | 44.5 | 25.4 | 26.3 | 8.0 | 5.6 | 45.7 | 26.2 | 27.1 | 7.7 | 6.8 | 44.8 | 26.9 | 27.9 | 7.7 |
|                    | Diamond Harbour   | 5.3  | 45.4 | 25.3 | 26.3 | 8   | 4.7 | 44.7 | 26.1 | 27.1 | 7.7 | 5.8 | 45.4 | 26.7 | 27.7 | 7.7 |
|                    | Canning           | 4.9  | 44.4 | 24.9 | 26.1 | 7.8 | 5.0 | 43.0 | 25.9 | 27.1 | 7.5 | 5.7 | 45   | 26.2 | 27.3 | 7.4 |
|                    | Baruipur          | 5.2  | 45.4 | 25.3 | 26.3 | 8.0 | 4.7 | 44.7 | 26.1 | 27.1 | 7.7 | 5.7 | 45.4 | 26.7 | 27.7 | 7.7 |
|                    | Alipore (Kolkata) | 3.9  | 47.5 | 25.8 | 26.6 | 8.9 | 4.0 | 47.9 | 26.6 | 27.5 | 8.5 | 4.9 | 46.7 | 27.2 | 28.2 | 8.5 |
|                    | Dum Dum           | 3.4  | 47.6 | 25.6 | 26.5 | 9.1 | 3.6 | 48.0 | 26.4 | 27.3 | 8.7 | 4.4 | 46.8 | 27   | 28   | 8.7 |
|                    | Kharagpur         | 3.8  | 48.0 | 25.6 | 26.4 | 9.2 | 3.1 | 49.6 | 26.5 | 27.1 | 9.0 | 4.4 | 49   | 27.1 | 27.9 | 9   |
|                    | Cinsurah          | 0.3  | 41.9 | 21.2 | 22.2 | 7.9 | 1.4 | 43.0 | 22.0 | 23.4 | 7.6 | 2.1 | 41.8 | 22.6 | 23.8 | 7.6 |
|                    | Krishnanagar      | -0.4 | 41.6 | 21.0 | 21.9 | 8.1 | 1.1 | 41.7 | 21.8 | 23.1 | 7.8 | 1.9 | 44.9 | 22.3 | 23.4 | 7.9 |
|                    | Srinekatan        | 2.1  | 48.2 | 25.6 | 26.4 | 9.7 | 2.8 | 47.5 | 26.5 | 27.5 | 9.4 | 3.6 | 49.9 | 27   | 27.9 | 9.5 |

|                   |      |      |      |      |      |      |      |      |      |      |      |      |      |      |     |
|-------------------|------|------|------|------|------|------|------|------|------|------|------|------|------|------|-----|
| <b>Asansol</b>    | 1.8  | 48.8 | 24.7 | 25.3 | 9.8  | 1.9  | 48.9 | 25.5 | 26.2 | 9.5  | 2.7  | 49.5 | 26.1 | 26.9 | 9.6 |
| <b>Birbhum</b>    | 2.0  | 48.5 | 25.6 | 26.3 | 9.7  | 2.7  | 47.6 | 26.4 | 27.3 | 9.4  | 3.5  | 49.4 | 27   | 27.9 | 9.5 |
| <b>Malda</b>      | 3.1  | 46.6 | 24.9 | 26.0 | 10.0 | 3.2  | 47.1 | 25.8 | 27.2 | 9.8  | 3    | 49   | 26.2 | 27.3 | 9.8 |
| <b>Siliguri</b>   | 2.4  | 46.2 | 23.9 | 24.7 | 10.1 | 2.6  | 47.5 | 24.8 | 26.2 | 10.1 | 3.4  | 47.5 | 25   | 26.2 | 10  |
| <b>Darjeeling</b> | -8.4 | 27.0 | 10.4 | 11.7 | 8.9  | -9.8 | 28.4 | 11.4 | 12.9 | 8.9  | -8.4 | 27.9 | 11.6 | 13.1 | 8.9 |

**Table S2.** Descriptive statistics for the variables temperature, relative humidity, wind speed, cloud cover, PET for all the study sites during the period 2046-2065 under RCP4.5 and RCP8.5 conditions. PET values are calculated using RayMan model and meteorological variables are retrieved from the CORDEX archive.

|                              |                          | 2046-2065 (RCP4.5) |         |      |        |                    | 2046-2065 (RCP8.5) |         |      |        |                    |
|------------------------------|--------------------------|--------------------|---------|------|--------|--------------------|--------------------|---------|------|--------|--------------------|
| Variables                    | Station                  | Minimum            | Maximum | Mean | Median | Standard Deviation | Minimum            | Maximum | Mean | Median | Standard Deviation |
| <b>Temperature (°C)</b>      | <b>Digha</b>             | 12.3               | 39.4    | 27.1 | 28.0   | 5.3                | 13.8               | 42.2    | 27.8 | 28.5   | 5.2                |
|                              | <b>Diamond Harbour</b>   | 10.9               | 38.7    | 27.1 | 28.3   | 5.5                | 12.1               | 43.3    | 27.8 | 28.8   | 5.3                |
|                              | <b>Canning</b>           | 11.2               | 38.1    | 26.7 | 28.2   | 6.4                | 11.7               | 42.0    | 27.6 | 28.8   | 5.2                |
|                              | <b>Baruipur</b>          | 10.9               | 38.7    | 27.1 | 28.3   | 5.5                | 12.1               | 43.3    | 27.8 | 28.8   | 5.3                |
|                              | <b>Alipore (Kolkata)</b> | 10.3               | 40.2    | 27.3 | 28.4   | 6.1                | 11.4               | 44.1    | 28.2 | 29.0   | 5.9                |
|                              | <b>Dum Dum</b>           | 10.3               | 40.2    | 27.3 | 28.4   | 6.1                | 11.4               | 44.1    | 28.2 | 29.0   | 5.9                |
|                              | <b>Kharagpur</b>         | 9.6                | 41.5    | 27.1 | 28.0   | 6.3                | 11.0               | 44.0    | 27.8 | 28.6   | 6.2                |
|                              | <b>Cinsurah</b>          | 10.3               | 40.2    | 27.3 | 28.4   | 6.1                | 11.4               | 44.1    | 28.2 | 29.0   | 5.9                |
|                              | <b>Krishnanagar</b>      | 10.2               | 40.8    | 27.2 | 28.2   | 6.3                | 11.2               | 43.2    | 28.2 | 29.1   | 6.1                |
|                              | <b>Srinekatan</b>        | 9.4                | 42.2    | 27.2 | 28.1   | 6.7                | 11.0               | 42.9    | 28.2 | 29.0   | 6.5                |
|                              | <b>Asansol</b>           | 8.8                | 42.3    | 26.4 | 27.3   | 6.7                | 10.7               | 42.9    | 27.5 | 28.0   | 6.5                |
|                              | <b>Birbhum</b>           | 9.4                | 42.2    | 27.2 | 28.1   | 6.7                | 11.0               | 42.9    | 28.2 | 29.0   | 6.5                |
|                              | <b>Malda</b>             | 8.3                | 40.8    | 26.5 | 27.6   | 6.9                | 10.5               | 41.4    | 27.5 | 28.6   | 6.7                |
| <b>Relative Humidity (%)</b> | <b>Siliguri</b>          | 8.3                | 40.5    | 25.9 | 26.9   | 7.0                | 9.9                | 42.5    | 26.6 | 27.6   | 6.9                |
|                              | <b>Darjeeling</b>        | -1.5               | 25.2    | 12.9 | 14.5   | 5.9                | -1.6               | 26.5    | 13.7 | 15.3   | 5.9                |
|                              | <b>Digha</b>             | 44.5               | 97.2    | 77.4 | 77.0   | 8.0                | 45.6               | 97.3    | 77.3 | 77.0   | 7.8                |
|                              | <b>Diamond Harbour</b>   | 33                 | 98.5    | 75.5 | 76.4   | 11.8               | 32.2               | 97.8    | 74.6 | 74.8   | 12.2               |
|                              | <b>Canning</b>           | 38.8               | 98.5    | 77.1 | 77.8   | 10.6               | 32.2               | 98.0    | 76.0 | 76.3   | 10.8               |
|                              | <b>Baruipur</b>          | 33.0               | 98.5    | 75.5 | 76.4   | 11.8               | 32.2               | 97.8    | 74.6 | 74.8   | 12.2               |
|                              | <b>Alipore (Kolkata)</b> | 24.2               | 98.5    | 74.5 | 77.1   | 13.7               | 16.8               | 98.3    | 73.3 | 75.5   | 14.4               |
|                              | <b>Dum Dum</b>           | 24.2               | 98.5    | 74.5 | 77.1   | 13.7               | 16.8               | 98.3    | 73.3 | 75.5   | 14.3               |
|                              | <b>Kharagpur</b>         | 9.7                | 98.6    | 70.7 | 72.9   | 16.3               | 14.0               | 97.9    | 70.1 | 71.6   | 16.6               |
|                              | <b>Cinsurah</b>          | 24.2               | 98.5    | 74.5 | 77.1   | 13.7               | 16.8               | 98.3    | 73.3 | 75.5   | 14.4               |
|                              | <b>Krishnanagar</b>      | 6.9                | 98.2    | 71.2 | 76.0   | 17.3               | 9.7                | 98.3    | 66.7 | 73.7   | 18.0               |
|                              | <b>Srinekatan</b>        | 3.4                | 98.2    | 69.2 | 75.1   | 19.7               | 6.9                | 98.1    | 68.0 | 72.6   | 20.1               |
|                              | <b>Asansol</b>           | 3.3                | 98.3    | 60.6 | 65.8   | 24.6               | 3.8                | 97.9    | 60.2 | 65.1   | 24.8               |
|                              | <b>Birbhum</b>           | 3.2                | 98.3    | 66.3 | 72.1   | 21.7               | 4.0                | 98.4    | 65.6 | 70.3   | 22.0               |
|                              | <b>Malda</b>             | 5.8                | 98.7    | 66.4 | 73.7   | 22.1               | 6.6                | 98.1    | 65.3 | 71.9   | 22.3               |

|                                |                   |     |      |      |      |      |     |      |      |      |      |
|--------------------------------|-------------------|-----|------|------|------|------|-----|------|------|------|------|
|                                | Siliguri          | 2.5 | 96.9 | 51.2 | 55.9 | 25.7 | 2.7 | 97.8 | 50.1 | 53.2 | 25.5 |
|                                | Darjeeling        | 3.2 | 99.6 | 54.6 | 59.0 | 28.4 | 3.5 | 99.1 | 53.7 | 56.2 | 28.3 |
|                                |                   |     |      |      |      |      |     |      |      |      |      |
| Wind Speed (ms <sup>-1</sup> ) | Digha             | 0.8 | 21.8 | 4.1  | 3.5  | 2.2  | 0.8 | 22.2 | 4.1  | 3.6  | 2.2  |
|                                | Diamond Harbour   | 0.6 | 20.1 | 3.7  | 3.1  | 2.1  | 0.6 | 18.4 | 3.7  | 3.2  | 2.1  |
|                                | Canning           | 0.5 | 18.8 | 3.6  | 3.0  | 2.0  | 0.6 | 17.2 | 3.6  | 3.1  | 2.0  |
|                                | Baruipur          | 0.6 | 20.1 | 3.7  | 3.1  | 2.1  | 0.6 | 18.4 | 3.7  | 3.2  | 2.1  |
|                                | Alipore (Kolkata) | 0.5 | 16.8 | 3.2  | 2.8  | 1.7  | 0.4 | 16.0 | 3.3  | 2.9  | 1.7  |
|                                | Dum Dum           | 0.5 | 16.8 | 3.2  | 2.8  | 1.7  | 0.4 | 16.0 | 3.3  | 2.9  | 1.7  |
|                                | Kharagpur         | 0.7 | 18.0 | 3.4  | 2.9  | 1.7  | 0.6 | 17.2 | 3.4  | 3.0  | 1.7  |
|                                | Cinsurah          | 0.5 | 16.8 | 3.2  | 2.8  | 1.7  | 0.4 | 16.0 | 3.3  | 2.9  | 1.7  |
|                                | Krishnanagar      | 0.4 | 16.8 | 3.3  | 2.9  | 1.7  | 0.5 | 15.5 | 3.4  | 3.0  | 1.7  |
|                                | Srinekatan        | 0.6 | 15.8 | 3.1  | 2.8  | 1.5  | 0.5 | 14.4 | 3.2  | 2.9  | 1.6  |
|                                | Asansol           | 0.5 | 15.6 | 3.1  | 2.9  | 1.5  | 0.6 | 15.8 | 3.2  | 2.9  | 1.5  |
|                                | Birbhum           | 0.6 | 15.8 | 3.1  | 2.8  | 1.6  | 0.5 | 14.4 | 3.2  | 2.9  | 1.6  |
|                                | Malda             | 0.5 | 14.6 | 3.0  | 2.7  | 1.5  | 0.6 | 13.8 | 3.0  | 2.7  | 1.5  |
|                                | Siliguri          | 0.7 | 13.6 | 2.7  | 2.4  | 1.4  | 0.6 | 12.9 | 2.7  | 2.4  | 1.4  |
|                                | Darjeeling        | 0.3 | 2.8  | 1.0  | 1.0  | 0.3  | 0.3 | 2.3  | 1.0  | 1.0  | 0.3  |
|                                |                   |     |      |      |      |      |     |      |      |      |      |
| Cloud Cover (Octa)             | Digha             | 0.0 | 8.0  | 2.6  | 1.8  | 2.6  | 0.0 | 8.0  | 2.5  | 1.7  | 2.5  |
|                                | Diamond Harbour   | 0.0 | 8.0  | 2.6  | 1.8  | 2.5  | 0.0 | 8.0  | 2.5  | 1.8  | 2.5  |
|                                | Canning           | 0.0 | 8.0  | 2.6  | 1.9  | 2.5  | 0.0 | 8.0  | 2.5  | 1.8  | 2.5  |
|                                | Baruipur          | 0.0 | 8.0  | 2.6  | 1.8  | 2.5  | 0.0 | 8.0  | 2.5  | 1.8  | 2.5  |
|                                | Alipore (Kolkata) | 0.0 | 8.0  | 2.5  | 1.6  | 2.5  | 0.0 | 8.0  | 2.4  | 1.6  | 2.5  |
|                                | Dum Dum           | 0.0 | 8.0  | 2.5  | 1.6  | 2.5  | 0.0 | 8.0  | 2.4  | 1.6  | 2.5  |
|                                | Kharagpur         | 0.0 | 8.0  | 2.5  | 1.6  | 2.6  | 0.0 | 8.0  | 2.4  | 1.5  | 2.6  |
|                                | Cinsurah          | 0.0 | 8.0  | 2.5  | 1.6  | 2.5  | 0.0 | 8.0  | 2.4  | 1.6  | 2.5  |
|                                | Krishnanagar      | 0.0 | 8.0  | 2.4  | 1.6  | 2.5  | 0.0 | 8.0  | 2.3  | 1.5  | 2.4  |
|                                | Srinekatan        | 0.0 | 8.0  | 2.4  | 1.5  | 2.5  | 0.0 | 8.0  | 2.3  | 1.4  | 2.4  |
|                                | Asansol           | 0.0 | 8.0  | 2.4  | 1.5  | 2.6  | 0.0 | 8.0  | 2.3  | 1.4  | 2.5  |
|                                | Birbhum           | 0.0 | 8.0  | 2.4  | 1.5  | 2.5  | 0.0 | 8.0  | 2.3  | 1.4  | 2.4  |
|                                | Malda             | 0.0 | 8.0  | 2.2  | 1.3  | 2.5  | 0.0 | 8.0  | 2.2  | 1.3  | 2.4  |
|                                | Siliguri          | 0.0 | 8.0  | 2.2  | 1.5  | 2.5  | 0.0 | 8.0  | 2.2  | 1.2  | 2.4  |
|                                | Darjeeling        | 0.0 | 8.0  | 3.1  | 2.8  | 2.6  | 0.0 | 8.0  | 3.1  | 2.7  | 2.6  |
|                                |                   |     |      |      |      |      |     |      |      |      |      |
| PET (°C)                       | Digha             | 8.5 | 45.2 | 27.4 | 28.2 | 7.8  | 9.2 | 49.4 | 28.5 | 29.4 | 7.7  |
|                                | Diamond Harbour   | 7.3 | 43.8 | 27.5 | 28.6 | 7.8  | 9.1 | 51.1 | 28.4 | 29.4 | 7.7  |
|                                | Canning           | 7.6 | 43.2 | 27.1 | 28.4 | 7.6  | 8.8 | 48.9 | 28.1 | 29.3 | 7.5  |
|                                | Baruipur          | 7.3 | 43.7 | 27.4 | 28.5 | 7.8  | 9.1 | 51.0 | 28.4 | 29.4 | 7.7  |
|                                | Alipore (Kolkata) | 6.8 | 46.6 | 28.0 | 29.0 | 8.6  | 8.6 | 52.4 | 29.1 | 29.9 | 8.5  |
|                                | Dum Dum           | 6.3 | 46.7 | 27.8 | 28.8 | 8.8  | 8.0 | 52.5 | 28.9 | 29.7 | 8.7  |



|                     |      |      |      |      |      |      |      |      |      |      |
|---------------------|------|------|------|------|------|------|------|------|------|------|
| <b>Kharagpur</b>    | 6.3  | 48.2 | 27.8 | 28.5 | 8.9  | 7.0  | 52.1 | 28.8 | 29.2 | 9.0  |
| <b>Cinsurah</b>     | 3.3  | 40.8 | 23.4 | 24.6 | 7.7  | 5.0  | 45.7 | 24.5 | 25.4 | 7.6  |
| <b>Krishnanagar</b> | 2.8  | 41.6 | 23.2 | 24.1 | 8.1  | 4.1  | 44.5 | 24.4 | 25.4 | 7.9  |
| <b>Srinekatan</b>   | 4.5  | 49.0 | 27.9 | 28.8 | 9.7  | 7.5  | 50.9 | 29.2 | 29.8 | 9.5  |
| <b>Asansol</b>      | 3.2  | 49.4 | 26.9 | 27.5 | 9.8  | 6.4  | 50.7 | 28.1 | 28.5 | 9.7  |
| <b>Birbhum</b>      | 4.4  | 49.2 | 27.9 | 28.7 | 9.7  | 7.5  | 50.7 | 29.1 | 29.7 | 9.5  |
| <b>Malda</b>        | 3.0  | 47.1 | 27.3 | 28.4 | 10.1 | 6.7  | 49.6 | 28.5 | 29.6 | 9.9  |
| <b>Siliguri</b>     | 2.4  | 47.4 | 26.3 | 27.3 | 10.4 | 5.0  | 50.5 | 27.2 | 28.5 | 10.3 |
| <b>Darjeeling</b>   | -6.4 | 29.5 | 12.7 | 14.2 | 8.8  | -6.8 | 31.0 | 13.6 | 15.0 | 9.0  |

**Table S3.** Descriptive statistics for the variables temperature, relative humidity, wind speed, cloud cover, PET for all the study sites during the period 2080-2099 under RCP4.5 and RCP8.5 conditions. PET values are calculated using RayMan model and meteorological variables are retrieved from the CORDEX archive.

| Variables                    | Station                  | 2080-2099 (RCP4.5) |         |      |        |                    | 2080-2099 (RCP8.5) |         |      |        |                    |
|------------------------------|--------------------------|--------------------|---------|------|--------|--------------------|--------------------|---------|------|--------|--------------------|
|                              |                          | Minimum            | Maximum | Mean | Median | Standard Deviation | Minimum            | Maximum | Mean | Median | Standard Deviation |
| <b>Temperature (°C)</b>      | <b>Digha</b>             | 11.5               | 41.4    | 27.4 | 28.1   | 5.3                | 12.2               | 43.9    | 29.7 | 30.3   | 5.3                |
|                              | <b>Diamond Harbour</b>   | 10.3               | 41.4    | 27.3 | 28.4   | 5.5                | 10.8               | 43.2    | 29.7 | 30.6   | 5.3                |
|                              | <b>Canning</b>           | 10.1               | 40.7    | 27.0 | 28.4   | 5.4                | 11.0               | 41.1    | 29.4 | 30.5   | 5.2                |
|                              | <b>Baruipur</b>          | 10.3               | 41.4    | 27.3 | 28.4   | 5.5                | 10.8               | 43.2    | 29.7 | 30.6   | 5.3                |
|                              | <b>Alipore (Kolkata)</b> | 9.5                | 42.7    | 27.6 | 28.6   | 6.1                | 9.7                | 46.2    | 30.2 | 30.9   | 6.0                |
|                              | <b>Dum Dum</b>           | 9.5                | 42.7    | 27.6 | 28.6   | 6.1                | 9.7                | 46.2    | 30.2 | 30.9   | 6.0                |
|                              | <b>Kharagpur</b>         | 8.9                | 43.7    | 27.4 | 28.2   | 6.3                | 9.6                | 47.9    | 30.0 | 30.7   | 6.3                |
|                              | <b>Cinsurah</b>          | 9.5                | 42.7    | 27.6 | 28.6   | 6.1                | 9.7                | 46.2    | 30.2 | 30.9   | 6.0                |
|                              | <b>Krishnanagar</b>      | 9.1                | 42.5    | 27.6 | 28.5   | 6.3                | 9.6                | 46.3    | 30.3 | 31.0   | 6.2                |
|                              | <b>Srinekatan</b>        | 8.6                | 43.2    | 27.6 | 28.4   | 6.7                | 10.2               | 47.2    | 30.3 | 31.0   | 6.7                |
|                              | <b>Asansol</b>           | 8.6                | 41.8    | 26.9 | 27.7   | 6.6                | 9.6                | 46.6    | 29.7 | 30.2   | 6.8                |
|                              | <b>Birbhum</b>           | 8.6                | 43.2    | 27.6 | 28.4   | 6.7                | 10.2               | 47.2    | 30.3 | 31.0   | 6.7                |
|                              | <b>Malda</b>             | 8.5                | 42.1    | 27.1 | 28.2   | 6.8                | 9.6                | 44.7    | 29.6 | 30.6   | 6.9                |
|                              | <b>Siliguri</b>          | 7.9                | 41.4    | 26.5 | 27.5   | 6.9                | 8.6                | 45.2    | 28.8 | 29.9   | 7.0                |
|                              | <b>Darjeeling</b>        | -2.3               | 25.5    | 13.3 | 15.0   | 5.8                | 0.0                | 27.3    | 16.1 | 17.7   | 5.8                |
| <b>Relative Humidity (%)</b> | <b>Digha</b>             | 34.0               | 97.4    | 76.2 | 75.8   | 8.2                | 46.4               | 96.6    | 76.2 | 75.8   | 8.1                |
|                              | <b>Diamond Harbour</b>   | 20.6               | 97.9    | 73.3 | 72.3   | 12.5               | 31.1               | 98.0    | 74.1 | 74.4   | 12.1               |
|                              | <b>Canning</b>           | 26.9               | 98.1    | 74.9 | 74.2   | 11.2               | 33.0               | 98.1    | 75.6 | 76.1   | 10.9               |
|                              | <b>Baruipur</b>          | 20.6               | 97.9    | 73.3 | 72.3   | 12.5               | 31.1               | 98.0    | 74.1 | 74.4   | 12.1               |
|                              | <b>Alipore (Kolkata)</b> | 19.4               | 98.3    | 71.7 | 72.5   | 14.7               | 23.6               | 98.2    | 73.1 | 75.7   | 14.1               |
|                              | <b>Dum Dum</b>           | 19.4               | 98.3    | 71.7 | 72.5   | 14.7               | 23.6               | 98.2    | 73.1 | 75.7   | 14.1               |
|                              | <b>Kharagpur</b>         | 14.9               | 98.4    | 68.6 | 68.9   | 16.7               | 14.1               | 98.0    | 70.0 | 71.3   | 16.0               |
|                              | <b>Cinsurah</b>          | 19.4               | 98.3    | 71.7 | 72.5   | 14.7               | 23.6               | 98.2    | 73.1 | 75.7   | 14.1               |
|                              | <b>Krishnanagar</b>      | 8.9                | 98.3    | 67.9 | 71.5   | 18.3               | 9.3                | 98.5    | 70.1 | 74.1   | 17.1               |

|                                |                   |     |      |      |      |      |     |      |      |      |      |
|--------------------------------|-------------------|-----|------|------|------|------|-----|------|------|------|------|
|                                | Srinekatan        | 7.5 | 98.7 | 66.3 | 70.6 | 20.3 | 7.1 | 98.7 | 68.6 | 73.5 | 19.2 |
|                                | Asansol           | 4.4 | 98.5 | 58.7 | 63.2 | 24.6 | 4.8 | 98.5 | 61.1 | 65.1 | 23.4 |
|                                | Birbhum           | 5.2 | 98.7 | 64.1 | 68.9 | 22.1 | 4.8 | 98.5 | 66.3 | 71.0 | 20.8 |
|                                | Malda             | 4.8 | 98.1 | 63.6 | 70.4 | 22.5 | 6.3 | 98.5 | 66.8 | 73.6 | 21.2 |
|                                | Siliguri          | 3.5 | 97.7 | 49.6 | 51.9 | 25.4 | 2.9 | 97.3 | 53.6 | 57.5 | 24.8 |
|                                | Darjeeling        | 4.3 | 99.8 | 53.3 | 55.3 | 28.0 | 3.7 | 99.8 | 57.1 | 62.6 | 26.9 |
|                                |                   |     |      |      |      |      |     |      |      |      |      |
| Wind Speed (ms <sup>-1</sup> ) | Digha             | 0.7 | 17.4 | 4.1  | 3.6  | 2.1  | 0.8 | 21.7 | 4.1  | 3.6  | 2.2  |
|                                | Diamond Harbour   | 0.5 | 16.2 | 3.7  | 3.1  | 2    | 0.6 | 16.4 | 3.7  | 3.2  | 2.0  |
|                                | Canning           | 0.5 | 15.3 | 3.6  | 3.1  | 1.9  | 0.6 | 16.9 | 3.6  | 3.1  | 2.0  |
|                                | Baruipur          | 0.5 | 16.2 | 3.7  | 3.1  | 2.0  | 0.6 | 16.4 | 3.7  | 3.2  | 2.0  |
|                                | Alipore (Kolkata) | 0.5 | 12.8 | 3.3  | 2.8  | 1.7  | 0.6 | 14.6 | 3.3  | 2.9  | 1.7  |
|                                | Dum Dum           | 0.5 | 12.8 | 3.3  | 2.8  | 1.7  | 0.6 | 14.6 | 3.3  | 2.9  | 1.7  |
|                                | Kharagpur         | 0.6 | 14.5 | 3.4  | 3.0  | 1.6  | 0.7 | 15.9 | 3.4  | 3.0  | 1.7  |
|                                | Cinsurah          | 0.5 | 12.8 | 3.3  | 2.8  | 1.7  | 0.6 | 14.6 | 3.3  | 2.9  | 1.7  |
|                                | Krishnanagar      | 0.6 | 13.6 | 3.3  | 2.9  | 1.7  | 0.5 | 15.7 | 3.3  | 2.9  | 1.7  |
|                                | Srinekatan        | 0.7 | 12.5 | 3.2  | 2.9  | 1.5  | 0.5 | 14.7 | 3.2  | 2.9  | 1.5  |
|                                | Asansol           | 0.7 | 14.4 | 3.2  | 2.9  | 1.5  | 0.7 | 15.0 | 3.1  | 2.9  | 1.5  |
|                                | Birbhum           | 0.7 | 12.5 | 3.2  | 2.9  | 1.5  | 0.5 | 14.7 | 3.2  | 2.9  | 1.5  |
|                                | Malda             | 0.5 | 13.7 | 3.0  | 2.7  | 1.5  | 0.6 | 13.7 | 3.0  | 2.7  | 1.5  |
|                                | Siliguri          | 0.6 | 14.0 | 2.8  | 2.4  | 1.4  | 0.5 | 12.5 | 2.7  | 2.4  | 1.4  |
|                                | Darjeeling        | 0.3 | 3.1  | 1.0  | 1.0  | 0.3  | 0.3 | 2.5  | 1.0  | 1.0  | 0.3  |
|                                |                   |     |      |      |      |      |     |      |      |      |      |
| Cloud Cover (Octa)             | Digha             | 0.0 | 8.0  | 2.6  | 1.8  | 2.5  | 0.0 | 8.0  | 2.5  | 1.6  | 2.5  |
|                                | Diamond Harbour   | 0.0 | 8.0  | 2.6  | 1.9  | 2.5  | 0.0 | 8.0  | 2.5  | 1.7  | 2.5  |
|                                | Canning           | 0.0 | 8.0  | 2.6  | 1.9  | 2.5  | 0.0 | 8.0  | 2.5  | 1.8  | 2.5  |
|                                | Baruipur          | 0.0 | 8.0  | 2.6  | 1.9  | 2.5  | 0.0 | 8.0  | 2.5  | 1.7  | 2.5  |
|                                | Alipore (Kolkata) | 0.0 | 8.0  | 2.5  | 1.7  | 2.5  | 0.0 | 8.0  | 2.4  | 1.5  | 2.5  |
|                                | Dum Dum           | 0.0 | 8.0  | 2.5  | 1.7  | 2.5  | 0.0 | 8.0  | 2.4  | 1.5  | 2.5  |
|                                | Kharagpur         | 0.0 | 8.0  | 2.5  | 1.6  | 2.6  | 0.0 | 8.0  | 2.4  | 1.3  | 2.5  |
|                                | Cinsurah          | 0.0 | 8.0  | 2.5  | 1.7  | 2.5  | 0.0 | 8.0  | 2.4  | 1.5  | 2.5  |
|                                | Krishnanagar      | 0.0 | 8.0  | 2.4  | 1.6  | 2.5  | 0.0 | 8.0  | 2.3  | 1.4  | 2.5  |
|                                | Srinekatan        | 0.0 | 8.0  | 2.3  | 1.5  | 2.5  | 0.0 | 8.0  | 2.3  | 1.3  | 2.5  |
|                                | Asansol           | 0.0 | 8.0  | 2.4  | 1.4  | 2.5  | 0.0 | 8.0  | 2.3  | 1.3  | 2.5  |
|                                | Birbhum           | 0.0 | 8.0  | 2.3  | 1.5  | 2.5  | 0.0 | 8.0  | 2.3  | 1.3  | 2.5  |
|                                | Malda             | 0.0 | 8.0  | 2.2  | 1.3  | 2.4  | 0.0 | 8.0  | 2.1  | 1.1  | 2.4  |
|                                | Siliguri          | 0.0 | 8.0  | 2.2  | 1.2  | 2.4  | 0.0 | 8.0  | 2.1  | 1.1  | 2.4  |
|                                | Darjeeling        | 0.0 | 8.0  | 3.0  | 2.7  | 2.6  | 0.0 | 8.0  | 2.9  | 2.4  | 2.6  |
|                                |                   |     |      |      |      |      |     |      |      |      |      |
| PET (°C)                       | Digha             | 7.1 | 46.7 | 27.7 | 28.4 | 7.9  | 8.5 | 50.6 | 31.2 | 32.2 | 8.0  |
|                                | Diamond Harbour   | 6.3 | 47.3 | 27.8 | 28.7 | 7.9  | 6.9 | 50.0 | 31.0 | 32.0 | 7.9  |

|                          |      |      |      |      |      |      |      |      |      |      |
|--------------------------|------|------|------|------|------|------|------|------|------|------|
| <b>Canning</b>           | 6.2  | 46.6 | 27.6 | 28.7 | 7.7  | 6.9  | 47.4 | 30.7 | 31.8 | 7.7  |
| <b>Baruipur</b>          | 6.3  | 47.3 | 27.7 | 28.6 | 7.9  | 6.9  | 50.0 | 31.0 | 31.9 | 7.9  |
| <b>Alipore (Kolkata)</b> | 5.8  | 49.7 | 28.4 | 29.1 | 8.7  | 6.4  | 54.0 | 31.8 | 32.6 | 8.7  |
| <b>Dum Dum</b>           | 5.4  | 49.8 | 28.2 | 29.0 | 9.0  | 5.9  | 54.1 | 31.6 | 32.4 | 9.0  |
| <b>Kharagpur</b>         | 5.2  | 50.9 | 28.2 | 28.6 | 9.2  | 6.1  | 56.5 | 31.7 | 32.2 | 9.3  |
| <b>Cinsurah</b>          | 2.3  | 44.8 | 23.7 | 24.8 | 7.8  | 2.6  | 48.6 | 27.2 | 28.2 | 7.8  |
| <b>Krishnanagar</b>      | 1.8  | 45.3 | 23.6 | 24.6 | 8.1  | 2.5  | 48.1 | 27.2 | 28.3 | 8.2  |
| <b>Srinekatan</b>        | 4.7  | 51.3 | 28.4 | 29.1 | 9.7  | 5.7  | 54.4 | 32.0 | 32.8 | 10.0 |
| <b>Asansol</b>           | 4.5  | 50.0 | 27.5 | 27.9 | 9.8  | 4.1  | 55.4 | 31.2 | 31.7 | 10.2 |
| <b>Birbhum</b>           | 4.8  | 51.4 | 28.4 | 29.0 | 9.8  | 5.7  | 55.0 | 32.0 | 32.7 | 9.9  |
| <b>Malda</b>             | 4.5  | 50.2 | 27.9 | 28.9 | 10.0 | 4.9  | 52.9 | 31.2 | 32.6 | 10.2 |
| <b>Siliguri</b>          | 3.8  | 49.0 | 27.0 | 28.1 | 10.3 | 3.7  | 52.3 | 30.1 | 31.6 | 10.5 |
| <b>Darjeeling</b>        | -6.8 | 30.4 | 13.3 | 14.6 | 8.8  | -4.0 | 32.4 | 16.4 | 18.1 | 8.8  |
